# Supplementary figures and images for: The Respiratory Commensal Bacterium Dolosigranulum pigrum 040417 Improves the Innate Immune Response to Streptococcus pneumoniae
Source: MDPI journal article supplement (doi:10.3390/microorganisms9061324), 2021-06-18

**BAL IL-1 $\beta$**

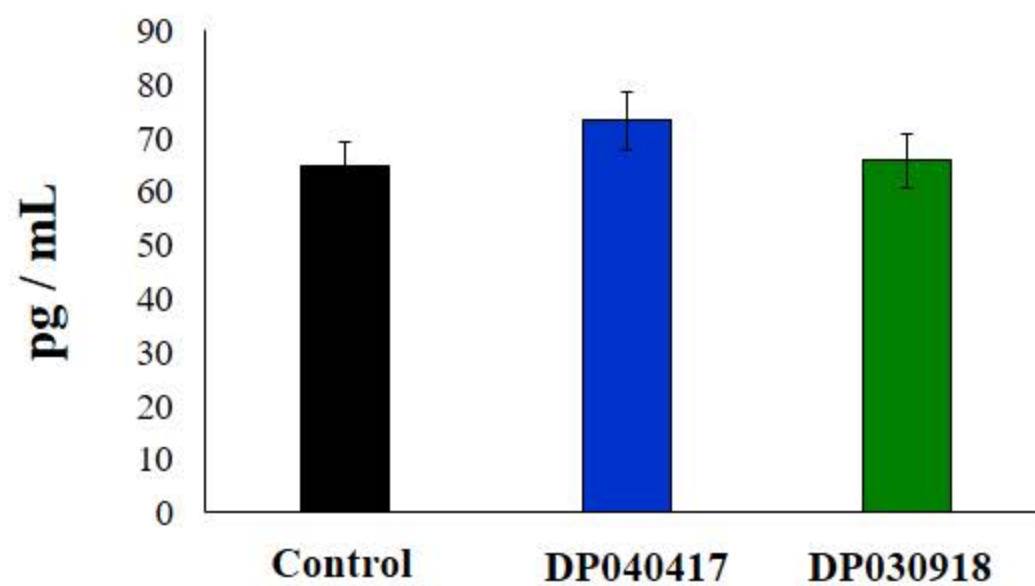

**BAL IL-6**

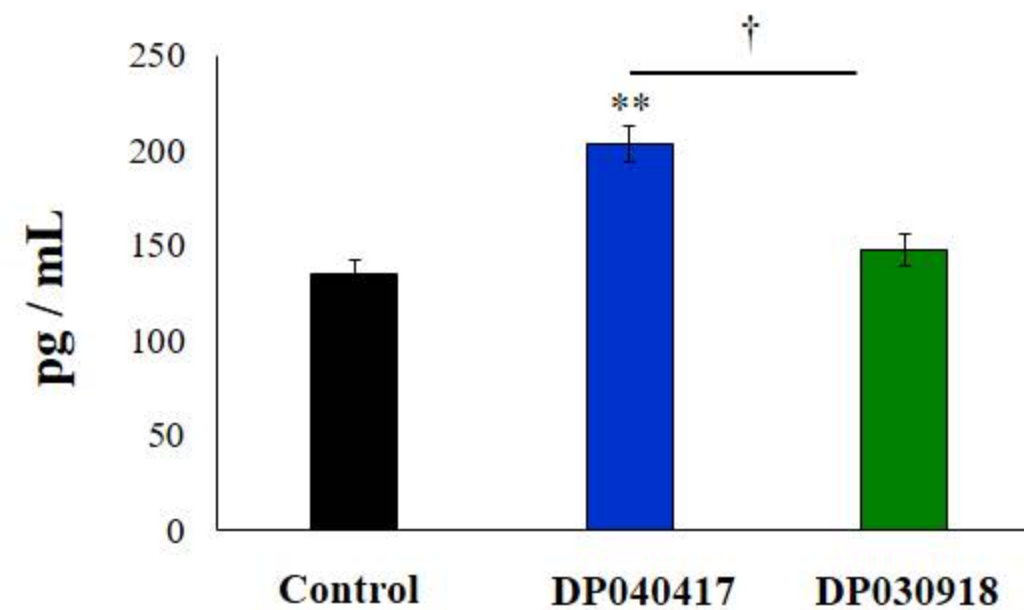

**BAL CCL2**

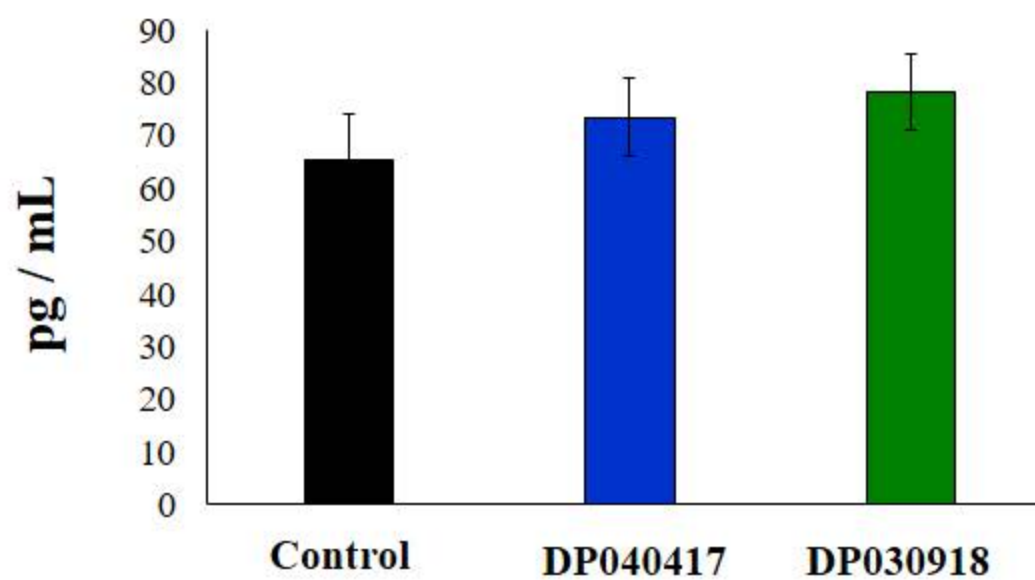

**BAL TNF- $\alpha$**

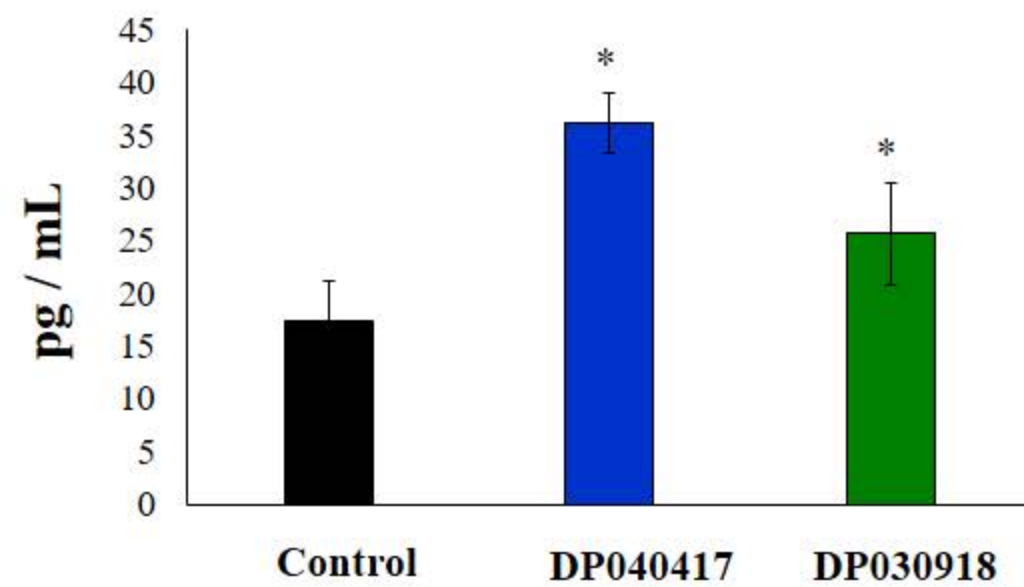

Supplement: s1 [file s1]
